# Supplementary material for: Membrane Localized Gbtmem214s Participate in Modulating Cotton Resistance to Verticillium Wilt
Source: Preprints.org preprint supplement (doi:10.20944/preprints202208.0302.v1), 2022-08-17
Supplement: Supplementary file 1 [file supplementary]

**Table S1** Primer pairs used in this study

| Primer pairs                                                                  | Forward Primer 5'-3'                | Reverse Primer 5'-3'                   | genes              |
|-------------------------------------------------------------------------------|-------------------------------------|----------------------------------------|--------------------|
| <b>Primer pairs for gene cloning</b>                                          |                                     |                                        |                    |
| Primer pairs C1                                                               | ATGGAGTCCGTCGATCTTC                 | TTAGACAGGGATTTGAGAGC                   | <i>GbTEME214-1</i> |
| Primer pairs C2                                                               | CTGTTCTGTTTATTACCCTCC               | GAAGCAGGGAAGGTAACTCG                   | <i>GbTEME214-4</i> |
| Primer pairs C3                                                               | CAGTCTTCTCCGACGAAACTCCGT            | GGCTGGTGAACCTTGGTCAAGAG                | <i>GbTEME214-7</i> |
| <b>Primer pairs for the quantitative RT-PCR</b>                               |                                     |                                        |                    |
| Primer pairs R1                                                               | TTTCTCGTTGTGCGATTTGG                | AACCGAAGTCTTTAGACAGGGA                 | <i>GbTEME214-1</i> |
| Primer pairs R2                                                               | TCCAAGAAGCAGACAAGT                  | TTACAACAGCAGCACCTA                     | <i>GbTEME214-4</i> |
| Primer pairs R3                                                               | CACATTTCCAGCACCTCAG                 | TTCCAGGAGAACCAGCAAGG                   | <i>GbTEME214-7</i> |
| <b>Primer pairs with restriction site for the construction of VIGS vector</b> |                                     |                                        |                    |
| Primer pairs V1                                                               | <b>GAATTC</b> CTTACTACTCTTGACCCTTG  | <b>GGATCCCC</b> CAGATCAAAATGCACTTAACCG | <i>GbTEME214-1</i> |
| Primer pairs V2                                                               | <b>GAATTC</b> CTACTCTTGATCCTTTGAGG  | <b>GGATCC</b> GGGGAAGATCGTTAAGAGCT     | <i>GbTEME214-4</i> |
| Primer pairs V3                                                               | <b>GAATTC</b> CCAGTGAATGCAGCGCAATTC | <b>GGATCC</b> GTGATAGGAAATTTATCCCG     | <i>GbTEME214-7</i> |
